# Supplementary material for: A paper-in-polymer-pond (PiPP) hybrid microfluidic microplate for multiplexed ultrasensitive detection of cancer biomarkers
Source: Royal Society of Chemistry journal article supplement (doi:10.1039/d4lc00485j), 2024-01-01
Supplement: d4lc00485j1.pdf [file d4lc00485j1.pdf]

## **Supplementary Information**

### **A Paper-in-Polymer-Pond (PiPP) Hybrid Microfluidic Microplate for Multiplexed Ultrasensitive Detection of Cancer Biomarkers**

Sanjay S. Timilsina <sup>1</sup> and XiuJun Li <sup>\*1,2</sup>

<sup>1</sup>Department of Chemistry & Biochemistry, University of Texas at El Paso, 500 W University Ave, El Paso, TX, USA

<sup>2</sup>Forensic Science, & Environmental Science and Engineering, 500 W University Ave, El Paso, TX, USA

\*Corresponding Author: XiuJun Li, [xli4@utep.edu](mailto:xli4@utep.edu)

**Table S1:** List of different biomarkers with their LOD and detection time

| <b>Biomarker</b> | <b>Device type</b>                               | <b>LOD (ng/mL)</b> | <b>Detection time (min)</b> | <b>Reference</b> |
|------------------|--------------------------------------------------|--------------------|-----------------------------|------------------|
| CEA              | PDMS-magnetic beads                              | 3.1                | 20                          | 1                |
| CEA              | Cotton thread-gold nanoparticles                 | 2.32               | ~60                         | 2                |
| CEA              | Paper-distance based                             | 2                  | >90                         | 3                |
| CEA              | Paper-movable valve                              | 0.3                | >120                        | 4                |
| CEA              | Polycarbonate-electrochemical with syringe pump  | 0.2                | <20                         | 5                |
| PSA              | Thermometer-nanoparticle mediated                | 1.0                | -                           | 6                |
| PSA              | Colorimetric- nanoparticles                      | 1.0                | 20 h                        | 7                |
| PSA              | Polycarbonate- electrochemical with Syringe pump | 2.0                | <20                         | 5                |
| PSA              | Gold nanoparticle- SPR                           | 5.0                | -                           | 8                |
| PSA              | PDMS- QD encoded beads                           | 1.0                | >60                         | 9                |

**Breakdown of device cost to perform 8 samples with 6 replicates (i.e., 48 assays):**

- Acrylic- \$1/device
- Paper- \$0.09/device
- Reagents including Antibody-\$2.9/device

Total: \$3.99/device; \$0.08/assay

**Reference:**

1. H. Chen, C. Chen, S. Bai, Y. Gao, G. Metcalfe, W. Cheng and Y. Zhu, *Nanoscale*, 2018, **10**, 20196-20206.
2. X. Jia, T. Song, Y. Liu, L. Meng and X. Mao, *Analytica chimica acta*, 2017, **969**, 57-62.
3. Y. Chen, W. Chu, W. Liu and X. Guo, *Sensors and Actuators B: Chemical*, 2018.
4. B. Li, L. Yu, J. Qi, L. Fu, P. Zhang and L. Chen, *Analytical chemistry*, 2017, **89**, 5707-5712.
5. A. Fragoso, D. Latta, N. Laboria, F. von Germar, T. E. Hansen-Hagge, W. Kemmner, C. Gärtner, R. Klemm, K. S. Drese and C. K. O'Sullivan, *Lab on a Chip*, 2011, **11**, 625-631.
6. G. Fu, S. T. Sanjay, M. Dou and X. Li, *Nanoscale*, 2016, **8**, 5422-5427.
7. G. Fu, S. T. Sanjay and X. Li, *Analyst*, 2016, **141**, 3883-3889.
8. M. Jazayeri, H. Amani, A. Pourfatollah, A. Avan, G. Ferns and H. Pazoki-Toroudi, *Cancer gene therapy*, 2016, **23**, 365.
9. S. W. Han, E. Jang and W.-G. Koh, *Sensors and Actuators B: Chemical*, 2015, **209**, 242-251.
